# Supplementary material for: Lung–brain ‘cross-talk’: systemic propagation of cytokines in the ARDS via the bloodstream using a blood transfusion model does not influence cerebral inflammatory response in pigs
Source: PeerJ. 2022 Mar 4;10:e13024. doi: 10.7717/peerj.13024 (PMC8900612; doi:10.7717/peerj.13024)
Supplement: Supplemental Information 1 [file peerj-10-13024-s001.xlsx]

## Sheet: PCR
Receiver (S)	Cortex				Hippocampus					Receiver	Cortex				Hippocampus					Donor (S)	Cortex				Hippocampus					Donor	Cortex				Hippocampus
	IL6	TNFa	iNOS	sLCN-2	IL6	TNFa	iNOS	sLCN-2		Animal	IL6	TNFa	iNOS	sLCN-2	IL6	TNFa	iNOS	sLCN-2		Animal	IL6	TNFa	iNOS	sLCN-2	IL6	TNFa	iNOS	sLCN-2		Animal	IL6	TNFa	iNOS	sLCN-2	IL6	TNFa	iNOS	sLCN-2
Animal										1	1.22e-05	3.87e-05	0.000598	0.0105	1.18e-05	0.000158	0.00108	0.0699												1	1.29e-05	3.8e-05	0.000482	0.0492	1.02e-05	7.75e-05	0.000925	0.00783
5	1.18e-05	5.53e-05	0.000615	0.00262						2	1.81e-05	2.14e-05	0.000347	0.00932	3.44e-06	7.99e-05	0.000547	0.00871		5	9.24e-06	8.52e-05	0.000526	0.0668	3.45e-05	8.24e-05	0.000868	0.00886		2	1.02e-05	0.000128	0.000504	0.0502	7.36e-06	0.000282	0.000447	0.0318
8	9.78e-06	5.17e-05	0.000497	0.0142	7.57e-06	5.81e-05	0.000721	0.00209		3	1.03e-05	0.0001	0.000573	0.00685	1.34e-05	7.5e-05	0.000368	0.00337		8	1.43e-05	4.46e-05	0.000572	0.00351	9.89e-06	6.52e-05	0.000635	0.0291		3	9.23e-06	5.53e-05	0.000429	0.114	1.38e-05	0.000125	0.000548	0.00573
10	1.43e-05	2.84e-05	0.00038	0.0216	4.83e-05	2.81e-05	0.000382	0.0183		4	6.33e-06	4.33e-05	0.00086	0.00162	5.58e-05	0.000134	0.00079	0.039		10	1.43e-05	7.12e-06	0.00023	0.00411	4.83e-05	5.43e-05	0.000411	0.00481		4	1.05e-05	4.77e-05	0.000419	0.0131	7.67e-06	0.000101	0.000708	0.0178
										6	1.99e-05	6.49e-05	0.000572	0.0104	5.98e-06	5.21e-05	0.00054	0.00435												6	9.28e-06	3.84e-05	0.000437	0.00682	5.6e-06	0.000121	0.000501	0.00932
										7	1.36e-05	4.71e-05	0.000433	0.0209	1.3e-05	0.000192	0.000585	0.0165												7	3.18e-05	3.79e-05	0.000525	0.00854	7.84e-06	5.3e-05	0.000355	0.00733
										9	7.07e-06	1.71e-05	0.000401	0.0143	1.37e-05	4.01e-05	0.000624	0.0169												9	1.65e-05	3.3e-05	0.000299	0.00618	1.19e-05	3.64e-05	0.000491	0.0247

## Sheet: Lactate_BE
LACTATE	Donor							Donor (S)			Receiver							Receiver (S)
BLH	1.3	0.7	0.7	0.9	1.4	0.7	0.5	1.6	0.6	0.8	1.3	1.4	0.9	1	1.5	1	1.7	1.3	0.6	1.3
0h	3.7	5.9	4.7	1.8	2	1.9	1.3	1.6	0.6	0.8	1.6	1.5	1	1.2	1.4	1.3	1.1	1.2	3	3.6
4h	2.4	3.4	2.2	0.6	1.1	0.6	0.6	0.9	0.5	0.7	0.8	0.5	0.5	0.5	0.6	0.5	0.8	0.7	0.9	0.7
8h	2.1	1.5	1.3	0.5	0.9	0.5	0.6	0.8	0.4	0.6	0.5	0.5	0.3	0.5	0.5	0.2	0.4	0.5	0.6	0.5
BE	Donor							Donor (S)			Receiver							Receiver (S)
BLH	9.8	5.7	-10.1	6.1	7.5	6.8	5.5	5.6	4.3	9.2	6.4	7	9.3	3.3	6.2	6.1	5.3	8	8.3	6.8
T0	3.8	-1.5	-4.2	2.1	4.5	5.4	3.1	5.6	4.3	9.2	6.9	6.4	3.8	1.4	-1.2	6.6	5.4	6.4	5.5	1.6
T4	8.4	-1	5.7	7.2	6.6	9.7	6	9.1	6	10.7	11	12.8	7.4	8.4	9.5	7.9	7.2	10.7	9.9	11.2
T8	9.7	0.1	6.4	8.5	6.2	9.4	5.4	7.7	5.6	9.2	10.9	9.6	5.9	7.8	6.3	8.1	7	9.1	9.4	10.8

## Sheet: Labor-Masterfile
Receiver		BLH										Receiver (S)
									mean	SD						mean	SD
Leucocytes		20.3	17.2	11.6	20.6	10.5	18.2	24.1	17.5	4.55757			23.8	15.29	14.1	17.73	4.31954
Erythrocyctes		5.39	5.98	4.93	5.78	5.39	5.63	5.99	5.58429	0.351562			5.21	5.41	5.86	5.49333	0.271825
Hemoglobin		8.2	9.6	8.7	9.1	9.8	9.3	9.4	9.15714	0.509502			8.2	9.4	9.7	9.1	0.648074
Hematocrit		25.9	30.6	26.5	29	29.7	29.2	30.6	28.7857	1.73981			26.3	29	30.3	28.5333	1.666
MCV		48.1	51.1	53.7	50.2	55.2	51.9	51	51.6	2.14742			50.4	53.6	51.7	51.9	1.31403
MCH		15.2	16.1	17.6	15.8	18.2	16.5	15.7	16.4429	1.00407			15.8	17.5	16.6	16.6333	0.694422
MCHC		31.7	31.4	32.7	31.5	33	31.8	30.7	31.8286	0.728431			31.4	32.5	32.1	32	0.454606
EVB		19.4	17.3	24.3	18.4	15.8	17.6	16.5	18.4714	2.61846			19.5	15.5	17.6	17.5333	1.63367
Thrombocytes		350	361	335	380	412	371	513	388.857	55.4602			491	442	365	432.667	51.8609
MTV		8.2	7.8	7.5	8	8.7	7.8	8.2	8.02857	0.357428			7.7	7.9	9.1	8.23333	0.618241
		T4
									mean	SD
Leucocytes		20.1	16.7	5.53	19.7	8.83	15.1	20.8	15.2514	5.50256			14.8	14.89	17.7	15.7967	1.34636
Erythrocyctes		6.01	6.78	7.01	7.13	6.36	6.45	6.34	6.58286	0.373237			6.32	6.64	6.26	6.40667	0.1668
Hemoglobin		9.5	11.1	12.3	12	11.5	10.7	10.4	11.0714	0.895567			10	11.7	10.5	10.7333	0.713364
Hematocrit		28.8	33.6	37.2	36	34.4	33.2	31.8	33.5714	2.55774			31.4	35.6	31.2	32.7333	2.02868
MCV		47.9	49.5	53.1	50.6	54.1	51.5	50.2	50.9857	1.96136			49.7	53.6	49.9	51.0667	1.7932
MCH		15.7	16.4	17.5	16.8	18.1	16.6	16.4	16.7857	0.731786			15.8	17.6	16.8	16.7333	0.736357
MCHC		32.9	33.1	33	33.3	33.5	32.2	32.6	32.9429	0.40305			31.8	32.9	33.6	32.7667	0.74087
EVB		19.2	17	21.8	17.9	15.8	17.3	16.2	17.8857	1.9037			18.9	15.8	17.5	17.4	1.26754
Thrombocytes		284	249	175	243	320	239	367	268.143	57.6155			303	379	329	337	31.5383
MTV		7.9	7.1	7.5	8.4	8.5	8.1	8.2	7.95714	0.465548			7.9	8.4	8.3	8.2	0.216025
		T8
									mean	SD
Leucocytes		17.9	14.1	10.6	18.4	9.71	9.69	19.4	14.2571	3.99674			13.6	13	14.5	13.7	0.616441
Erythrocyctes		5.83	6.93	6.76	6.68	6.37	6.15	6	6.38857	0.384761			6.08	6.37	5.79	6.08	0.236784
Hemoglobin		9.2	11.1	11.5	11.2	10.7	10.2	9.9	10.5429	0.757547			9.5	11.2	9.8	10.1667	0.74087
Hematocrit		28.2	34.4	35.7	33.7	34.5	31.2	29.9	32.5143	2.56984			30.5	33.8	29.1	31.1333	1.97034
MCV		48.3	49.6	52.8	50.3	54.2	50.8	49.8	50.8286	1.87061			50.1	53.1	50.3	51.1667	1.36951
MCH		15.8	16	17	16.8	16.8	16.6	16.5	16.5	0.410575			15.5	17.6	16.9	16.6667	0.873053
MCHC		32.7	32.2	32.2	33.3	31	32.7	33.1	32.4571	0.706818			31	33.2	33.6	32.6	1.1431
EVB		19.1	17	22.1	17.9	15.6	17.4	16.3	17.9143	1.99959			18.8	15.8	17.5	17.3667	1.22837
Thrombocytes		297	257	165	217	301	266	330	261.857	51.8857			330	328	292	316.667	17.4611
MTV		8.2	7.2	7.9	8.3	8.9	7.9	8.2	8.08571	0.476381			7.8	7.9	8.6	8.1	0.355903
Donor												Donor (S)
		BLH
									mean	SD						mean	SD
Leucocytes		12.2	5.62	12	16.6	7.92	8.19	11.4	10.5614	3.35816			5.61	16.1	19.7	13.8033	5.97707
Erythrocyctes		4.84	5.68	5.87	5.17	6.21	5.7	5.51	5.56857	0.418345			5.93	5.93	5.81	5.89	0.0565685
Hemoglobin		8.4	9.8	9.9	9.1	10.4	9.6	9.4	9.51429	0.591435			9.5	10.2	9.3	9.66667	0.385861
Hematocrit		26.4	29.2	30.2	27.9	33.8	30.3	29.6	29.6286	2.13054			30.7	32.2	29.4	30.7667	1.14407
MCV		54.6	51.5	51.5	53.9	54.5	53.2	53.7	53.2714	1.20323			51.8	54.3	50.6	52.2333	1.54128
MCH		17.4	17.3	16.8	17.6	16.7	16.8	17.1	17.1	0.320713			16.1	17.2	15.9	16.4	0.571548
MCHC		31.8	33.5	32.6	32.7	30.7	31.5	31.9	32.1	0.846843			31	31.7	31.5	31.4	0.294392
EVB		15.8	16.4	17.9	16.5	16.7	17.7	15.9	16.7	0.757816			18.5	16.9	18.7	18.0333	0.805536
Thrombocytes		337	320	195	366	289	344	385	319.429	58.2969			358	433	373	388	32.4037
MTV		9	8	8.3	8.1	8.7	8.3	8.8	8.45714	0.349927			7.7	7.5	9.1	8.1	0.711805
		T4
									mean	SD						mean	SD
Leucocytes		24	12.3	18.1	36.8	10.47	9.32	18.5	18.4986	8.88412			6.61	20.79	15.6	14.3333	5.85784
Erythrocyctes		5.43	6.08	6.82	5.87	6.23	5.58	5.41	5.91714	0.470553			5.79	5.76	5.57	5.70667	0.0974109
Hemoglobin		9.6	10.5	11.4	10.4	10.6	9.4	9.3	10.1714	0.710562			9.2	9.9	8.9	9.33333	0.418994
Hematocrit		30.1	32.5	35.8	31.7	33.4	29.2	28.5	31.6	2.37005			29.5	30.4	27.4	29.1	1.25698
MCV		55.5	53.5	52.6	54	53.6	52.3	52.6	53.4429	1.021			51.1	52.8	49.3	51.0667	1.42906
MCH		17.8	17.3	16.7	17.8	16.9	16.8	17.1	17.2	0.420883			15.9	17.2	16	16.3667	0.590668
MCHC		32	32.3	31.9	32.9	31.6	32.2	32.5	32.2	0.392792			31.1	32.7	32.5	32.1	0.711805
EVB		15.7	15.9	17.5	16.6	16.7	17.7	16	16.5857	0.725905			18.2	16.3	18.6	17.7	1.00333
Thrombocytes		258	73	189	303	212	271	309	230.714	76.2378			278	368	353	333	39.37
MTV		9.7	9.7	9.7	8.4	8.8	7.7	8.3	8.9	0.754037			7.8	7.1	8.6	7.83333	0.612826
		T8
									mean	SD						mean	SD
Leucocytes		19.8	19.1	26.5	25.2	10.2	10.7	15.3	18.1143	5.97457			8.59	18.82	14.1	13.8367	4.18053
Erythrocyctes		4.99	6.08	6.19	5.46	5.87	5.22	5.3	5.58714	0.427007			5.45	5.87	5.16	5.49333	0.291471
Hemoglobin		8.7	10.5	10.4	9.5	9.9	8.7	9.1	9.54286	0.696639			8.8	9.8	8.4	9	0.588784
Hematocrit		26.5	31.8	31.8	29.2	31.2	27.2	28	29.3857	2.07049			27.8	31	25.5	28.1	2.25536
MCV		53.1	52.4	51.4	63.4	53.2	52.2	52.8	54.0714	3.85031			50.9	52.8	49.5	51.0667	1.35236
MCH		17.5	17.3	16.7	17.3	16.9	16.7	17.2	17.0857	0.294854			16.2	16.8	16.3	16.4333	0.262467
MCHC		32.9	33	32.6	32.4	31.7	31.9	32.6	32.4429	0.449943			31.8	31.8	33	32.2	0.565685
EVB		15.9	16.1	17.5	16.6	16.3	17.8	15.9	16.5857	0.714			18.2	16.9	18.6	17.9	0.725718
Thrombocytes		265	81	182	342	166	231	303	224.286	82.3507			296	359	301	318.667	28.5929
MTV		9.3	10.2	9.7	8.5	9.6	8.3	8	9.08571	0.762381			8.6	7.3	9	8.3	0.725718

## Sheet: Receiver-Masterfile
ARDS - Receiver Masterfile
			Weight [kg]	Temp (PiCCO)	Wet weight lung	Dry weight lung	W/D lung	Arterenol 5/50	FiO2	ZVD	PCWP	MV	Peak	Pmean	PEEP	FRCI	FRCII	Mittel FRC	Peso	CI	GEDI	EVLWI	SpO2	SaO2 BGA	Horowitz	pO2 art	ph art	pCO2 art	BE art	So2 PA	pO2 PA	ph PA	pCO2 PA	BE PA	Lactat art	Hb art	Glucose	Potassium
ARDS52-E-01		BLH recipient	29	37.8				0	0.4	9	14	8.9	19	10	5	740	714	727	-	3.35	501	10	100	100	487.5	195	7.441	45.6	6.4	51	36.2	7.373	36.2	8.8	1.3	7.8	99	4
		T0	29	38.1				0	0.4	17	18	9.9	23	11	5	668	647	657.5	-	4.02	633	10	100	100	467.5	187	7.483	41.4	6.9	55.8	37.5	7.41	36.2	9	1.6	9.3	115	3.8
		T1	29	39				0	0.4	14	16	9.8	23	11	5	698	684	691	-	3.18	525	12	100	100	470	188	7.541	38.8	9.8	51.2	33.7	7.466	50.4	11.5	1.4	9.5	104	4.3
		T2	29	39.4				0	0.4	13	15	9.9	22	11	5	618	643	630.5	-	3.66	544	12	100	100	437.5	175	7.547	39.2	10.6	55.3	36.2	7.476	46.6	9.9	1.2	9.7	101	4.3
		T3		39.3				0	0.4	11	14	10.8	23	11	5	640	644	642	-	3.85	511	13	100	99.9	415	166	7.577	38.1	10.6	60.6	37.9	7.508	47.7	13.6	0.9	9.3	88	4.1
		T4		39.3				0	0.4	10	14	9.9	22	11	5	640	664	652	-	3.93	532	13	100	100	362.5	145	7.561	38.1	11	60.2	145	7.561	38.1	11	0.8	9.3	80	4.1
		T5		39.2				0	0.4	9	14	10.8	24	12	6	639	665	652	-	4.35	556	14	100	100	315	126	7.56	39.3	11.8	63.5	38.8	7.516	46.9	13.7	0.6	9.3	81	4.1
		T6		39				0	0.4	8	14	9.9	23	11	4	695	648	671.5	-	4.5	590	14	100	100	327.5	131	7.561	38.8	11.6	63.9	38.4	7.512	46.1	12.8	0.5	9.4	59	4
		T7		39				0	0.4	7	10	9.9	25	11	4	564	702	633	-	4.37	5.38	13	100	100	312.5	125	7.549	38.9	10.5	65.8	39.4	7.51	45.6	12.3	0.5	9.3	48	3.9
		T8		38.8	80.3	16.55	4.85196	0	0.4	7	9	10	25	11	4	684	711	697.5		4	557	14	100	100	327.5	131	7.553	38.8	10.9	61.3	37.7	7.506	45.8	12	0.5	9.2	60	3.9
		Ergebnisse
ARDS52-E-2		BLH recipient	28	38.4				0	0.4	6	11	7.7	17	9	5	878	935	906.5	6	3.46	493	13	99	100	485	194	7.487	41	7	45.8	32.7	7.392	49.7	4.9	1.4	9	121	4
		T0	28	38.2				0	0.4	9	9	9.2	20	10	5	753	779	766	11	3.57	442	11	100	100	497.5	199	7.426	47.9	6.4	72.3	47.2	7.369	57.9	7.2	1.5	12.3	177	4
		T1	28	38.5				0	0.4	9	8	9.2	19	9	5	700	712	706	8	3.38	458	11	100	100	465	186	7.551	37	9.3	67.4	41.8	7.473	51.3	12.6	0.9	11.4	117	3.8
		T2	28	38.3				0	0.4	9	9	9.2	19	9	5	719	755	737	9	3.32	470	12	100	100	465	186	7.54	37.3	9.2	63.6	40.1	7.499	49.7	14	0.6	11	101	3.5
		T3	28	38.2				0	0.4	9	9	9.2	19	9	5	735	697	716	6	3.5	481	13	100	100	452.5	181	7.555	37.8	10.3	65.4	40.4	7.498	49.7	14	0.6	10.3	88	3.9
		T4	28	39				0	0.4	8	9	9.2	19	9	5	707	738	722.5	9	3.18	448	12	100	100	447.5	179	7.565	39.9	12.8	61.5	37.6	7.52	47.6	14.5	0.5	10.9	87	4.3
		T5	28	39.7				0	0.4	8	-	9.2	19	9	5	730	783	756.5	8	3.97	469	13	100	100	400	160	7.557	39.3	11.6	63.1	38.3	7.507	45.8	12.1	0.6	10.7	77	4.1
		T6	28	39.6				0	0.4	8	-	9.1	19	10	4	757	797	777	9	3.91	430	14	100	100	387.5	155	7.556	37.7	10.2	65.3	39.1	7.517	45.1	12.5	0.5	10.5	69	3.6
		T7	28	39.1				0	0.4	8	-	9.3	19	10	5	714	762	738	10	3.65	445	14	100	100	385	154	7.562	37.8	10.9	67.2	38.7	7.52	45.3	12.9	0.5	10.3	90	3.6
		T8	28	38.8	80.12	15.9	5.03899	0	0.4	8	-	9.2	20	10	5	733	741	737	8	3.4	426	14	100	100	402.5	161	7.569	35.5	9.6	64.3	38.6	7.525	44.3	12.6	0.5	10.5	82	3.6
		Ergebnisse
ARDS52-E-3		BLH recipient	27	35.8				0	0.4	6	-	5.4	15	8	5	743	720	731.5	-	3.25	494	11	99	100	507.5	203	7.492	43.7	9.3	67.7	42.2	7.432	45.5	5.6	0.9	8.1	113	4.3
		T0	27	36.3				0	0.4	17	-	6.4	17	9	4	613	592	602.5	3	3.68	545	10	98	100	477.5	191	7.467	38.5	3.8	76.6	47.5	7.409	48.5	5.4	1	10.2	133	3.9
		T1	27	37.8				0	0.4	12	-	6.4	17	9	5	539	533	536	4	3.18	457	12	98	99.8	380	152	7.449	37	1.6	78.3	50.9	7.43	50.8	8.5	1.1	11.2	103	4
		T2	27	38.6				0	0.4	10	-	6.4	19	9	4	508	478	493	1	2.52	408	12	97	99.8	377.5	151	7450	43.1	5.4	67.6	43.5	7.401	45.5	3.1	1.1	12.5	94	4.4
		T3	27	38.9				0	0.4	9	-	6.4	19	9	5	481	510	495.5	4	3.2	441	12	97	99.4	365	146	7.472	42	6.5	67.3	42.7	7.415	48.8	6	0.8	12.8	91	4.6
		T4	27	38.2				0	0.4	9	-	6.4	20	10	4	467	487	477	4	3.69	534	15	96	98.7	290	116	7.479	42.6	7.4	68.6	43	7.43	48.5	7.1	0.5	11.8	83	4.5
		T5	27	37.9				0	0.4	9	-	6.4	20	10	4	468	475	471.5	3	3.99	488	14	96	97.5	247.25	98.9	7.485	41.4	7.1	70.9	43.5	7.447	47.9	8.2	0.4	11.2	77	4.4
		T6	27	37.9				0	0.4	8	-	6.4	22	10	4	479	497	488	3	3.43	494	14	95	97.5	243.75	97.5	7.481	40.6	6.3	69.1	44.2	7.442	45.6	6.3	0.4	11.1	52	4.3
		T7	27	37.7				0	0.4	10		6.4	22	10	4	471	422	446.5	5	3.93	573	18	95	97.4	234	93.6	7.488	37.2	4.5	75	45.9	7.449	47.9	8.4	0.4	11	77	4.4
		T8	27	37.7	74	15	4.93333	0	0.4	8	-	6.4	22	10	4	520	502	511	5	3.61	531	24	94	96.5	221.75	88.7	7.472	41.1	5.9	68.1	42.5	7.435	47.2	6.7	0.3	10.8	80	4.1
		Ergebnisse
ARDS52-E-04		BLH recipient	24	35.5				0	0.4	4	-	9	16	10	5	639	618	628.5	8	2.3	316	7	98	100	550	220	7.408	44.7	3.3	58.6	40.3	7.357	54.8	4.9	1	8.7	105	3.9
		T0		35.7				0	0.4	15		6.7	27	12	4	426	420	423	10	2.46	332	7	96	96	243.75	97.5	7.3	25.6	1.4	59.8	44.9	7.265	67.8	3.3	1.2	10.9	147	4
		T1		36.8				0	0.4	10	11	6.6	23	11	4	464	474	469	10	2.27	356	8	95	99.8	412.5	165	7.467	41.8	5.9	61.2	39.6	7.411	52.4	7.8	1.1	11.4	111	3.9
		T2		38				0	0.4	10	10	6.6	23	11	4	494	500	497	11	2.43	349	9	94	99.7	380	152	7.461	43.7	6.7	74.3	44.5	7.427	46.9	5.9	1	11.8	109	4.3
		T3		39.3				0	0.4	9	11	6.6	24	11	4	477	498	487.5	10	2.41	338	9	98	99.4	330	132	7.479	43.9	8.2	73.4	42.6	7.432	45.6	5.6	0.7	11.7	99	4.5
		T4		38,9				0	0.4	8	10	6.7	24	11	4	477	393	435	10	2.52	335	10	98	99.2	317.5	127	7.458	43.3	8.4	59	37.3	7.434	52.5	9.9	0.5	11.3	88	4.4
		T5		38.9				0	0.4	9	9	7	24	11	4	450	467	458.5	9	2.52	327	10	98	98.9	290	116	7.481	42.5	7.5	59.9	38.6	7.439	50.7	9.2	0.4	11	85	4.5
		T6		38.5				0	0.4	8	10	7	24	11	4	444	456	450	11	2.46	336	10	97	98.9	272.5	109	7.506	39.8	7.7	59.6	36.6	7.456	48.9	9.6	0.4	10.6	88	4.1
		T7		38.1				0	0.4	9	10	7	25	11	4	406	446	426	9	2.27	331	10	97	98.9	282.5	113	7.504	39.5	7.3	61.5	37.7	7.444	48.1	8.1	0.4	10.6	79	4
		T8		38	nan	13	#VALUE!	0	0.4	8	9	7	25	11	4	406	393	399.5	11	2.23	308	11	97	98.9	285	114	7.508	39.7	7.8	65.7	38.7	7.468	46.8	9.2	0.5	10.6	72	4
		Ergebnisse
ARDS52-E-05		BLH recipient	20	38.6				0	0.4	9	10	6.4	20	10	4	715	696	705.5	5	2.52	326	8	100	100	442.5	177	7.487	42.5	8	46	32.1	7.418	50.8	7.7	1.3	8.2	113	4.7
10:08:00		T0		38.1				0	0.4	15	35	7.2	24	11	4	nan	nan		9	2.27	334	8	100	100	522.5	209	7.479	41.1	6.4	44.8	32.4	7.395	54.4	7.8	1.2	9.4	128	4.5
		T1		37.8				0	0.4	11	16	7.6	23	11	4	302	260	281	8	2.6	328	8	100	100	507.5	203	7.648	27.5	8.5	56.3	35.5	7.567	35.5	9.3	1.3	9.8	107	4.3
		T2		39.2				0	0.4	11	13	6.7	22	10	4	302	296	299	12	2.76	343	8	100	100	417.5	167	7.614	31.3	9.5	51.6	31.9	7.541	41.1	11.7	1.3	9.7	102	4.6
Sham!!!!!		T3		38.8				0	0.4	11	14	6.2	22	11	4	272	281	276.5	8	3.17	477	16	100	100	382.5	153	7.619	32.6	11.1	48.9	29.9	7.544	41.5	12.2	0.9	9.9	87	4.6
		T4		38.6				0	0.4	10	12	5.6	24	11	5	284	287	285.5	7	2.74	336	8	100	99.7	317.5	127	7.597	34.2	10.7	54.1	32.6	7.53	42.5	11.7	0.7	9.6	66	4.5
		T5		37.6				0	0.4	9	11	5.6	24	11	5	313	242	277.5	8	2.82	330	9	100	99.5	282.5	113	7.578	33.9	8.9	59.1	34.7	7.53	42.4	11.6	0.6	9.4	98	3.9
		T6		38.1				0	0.4	11	10	5.1	24	11	5	320	331	325.5	8	2.88	337	9	99	99.1	252.5	101	7.563	36.3	9.7	58.7	35.9	7.522	43.2	11.6	0.5	9.3	79	4
		T7		39.4				0	0.4	9	10	5.1	24	11	5	349	322	335.5	9	2.81	340	9	99	98.5	245.25	98.1	7.559	37.2	10	55.2	34	7.498	43.5	9.7	0.5	9.4	75	4.3
		T8		39.4	58	13	4.46154	0	0.4	10	12	5.1	25	11	5	354	371	362.5	8	2.75	345	9	100	98.5	252.5	101	7.552	36.8	9.1	53	33.3	7.493	44.8	10.2	0.5	9.1	72	4.3
		Ergebnisse
ARDS52-E-6		BLH recipient	28	35.3				3	0.4	8	9	5	16	9	5	610	559	584.5	7	2.9	417	12	100	100	522.5	209	7.505	37.9	6.2	64.2	39.6	7.46	45.4	7.8	1.5	9.4	108	3.7
		T0		35.6				0	0.4	12	12	5.5	21	10	5	629	546	587.5	10	2.5	433	11	96	99.7	335	134	7.39	39.1	-1.2	59.9	40.8	7.388	51.9	5.6	1.4	10.6	124	4
		T1		36.7				0.1	0.4	10	11	5.6	19	9	4	591	505	548	10	2.81	548	13	100	100	437.5	175	7.51	40.7	8.7	59.5	37.9	7.436	48.2	7.4	0.8	12.1	102	4.2
		T2		37.6				0.1	0.4	9	11	5.6	18	9	4	611	636	623.5	10	3.09	516	12	99	100	402.5	161	7.515	39.8	8.4	63	40.1	7.47	47.5	9.9	0.8	11.5	101	4
		T3		38.5				0.1	0.4	10	11	5.6	18	9	4	580	549	564.5	10	2.98	453	13	99	99	355	142	7.518	40.3	9	71.6	44.7	7.493	44.6	9.9	0.7	11.2	91	4
		T4		38.4				0	0.4	9	12	5.6	19	9	4	535	514	524.5	11	3.09	434	14	99	99.9	342.5	137	7.516	41.2	9.5	63.8	39.3	7.46	46.8	8.6	0.6	11.2	73	4.2
		T5		38.5				0	0.4	10	10	5.6	19	9	4	512	566	539	11	3.1	459	14	99	99.7	327.5	131	7.523	41.1	10.1	64.5	39.4	7.48	48.6	11.5	0.6	11.2	78	4.3
		T6		39				0	0.4	9	9	5.6	20	10	4	571	570	570.5	12	3.15	443	14	98	99.1	302.5	121	7.519	39.6	8.6	63	38.9	7.478	49.4	11.9	0.5	11.1	79	4.2
		T7		38.8				0	0.4	10	11	5.6	21	10	4	572	519	545.5	12	3.05	409	14	99	98.9	277.5	111	7.501	42.2	8.9	62.8	39.7	7.458	49.8	10.4	0.5	11	93	4.2
		T8		38.4	71	15	4.73333	0	0.4	10	11	5.6	21	10	4	546	508	527	11	2.53	406	16	98	99.2	290	116	7.496	39	6.3	59.5	38.2	7.447	50.3	9.7	0.5	10.8	95	3.5
		Ergebnisse
ARDS52-E-7		BLH recipient	29	38				0	0.4	8	9	6.8	15	8	4	517	491	504	11	4.06	556	12	100	100	355	142	7.499	38.4	6.1	60	36.8	7.441	45.8	6.5	1	8.9	101	3.9
		T0		38.4				0	0.4	10	13	6.8	18	9	4	417	456	436.5	15	4.47	570	11	100	100	440	176	7.495	39.7	6.6	67.2	41.3	7.444	43.8	5.5	1.3	9.6	120	4
		T1		39.8				0	0.4	11	12	6.9	18	9	5	397	369	383	14	2.87	573	11	98	100	405	162	7.541	36	7.7	44.1	30.8	7.456	49	9.7	1	10.2	102	4.7
		T2		39.8				0	0.4	11	13	6.9	19	9	4	381	362	371.5	15	2.97	579	11	100	100	407.5	163	7.549	33.6	6.4	43	29.6	7.462	49.2	10.3	0.8	10.1	80	4.8
		T3		39.6				0	0.4	11	11	6.9	19	9	4	394	383	388.5	14	3.2	565	12	100	100	392.5	157	7.553	35.4	8.2	56.6	34.9	7.474	38.8	4.5	0.6	10.8	69	4.9
		T4		39.3				0	0.4	7	10	6.9	18	9	5	380	366	373	15	3.75	559	12	100	99.2	312.5	125	7.562	34.2	7.9	57.5	35.7	7.49	45.5	10.3	0.5	10.1	77	4.6
		T5		39.1				0	0.4	7	15	7	19	9	5	358	342	350	14	4.01	541	13	100	97.8	240.5	96.2	7.556	37.1	9.7	61.2	36.6	7.488	41.5	7.4	0.5	10	82	4.6
		T6		38.9				0	0.4	8	10	7	20	10	5	379	368	373.5	14	3.94	550	13	100	97.1	226.75	90.7	7.547	37	8.9	58.5	37.1	7.477	42.4	7.2	0.3	10	81	4.1
		T7		38.6				0	0.4	8	10	7	21	10	4	423	423	423	14	3.79	536	14	100	96.6	215.75	86.3	7.551	35.9	8.4	58.8	36.4	7.496	43.1	9.2	0.4	10	84	3.7
		T8		38.3	72	14	5.14286	0	0.4	6	9	6.6	21	10	5	477	417	447	13	3.77	551	13	100	96.4	210.5	84.2	7.526	38.1	8.1	58.7	37.7	7.476	46	9.5	0.2	9.8	110	3.7
		Ergebnisse
ARDS52-08E		BLH recipient	27	36.7				0	0.4	7	12	5.8	17	9	4	1091	1048	1069.5	7	2.41	455	10	94	100	502.5	201	7.512	40	8.3	53.9	33.2	7.454	48.3	9.2	0.6	8.7	106	3.9
		T0		36.5				0	0.4	13	13	7.7	21	10	4	859	825	842	11	3.97	420	10	97	100	357.5	143	7.392	47.9	5.5	73.2	47.9	7.358	47.9	4.9	3	10.7	161	4.1
		T1		37.4				0	0.4	10	12	7.6	19	10	5	773	747	760	10	2.26	424	11	99	100	470	188	7.559	35.6	8.8	55.4	33.3	7.484	44.5	9.1	1.5	11.3	113	4.3
		T2		38.1				0	0.4	10	13	7.7	20	10	5	782	730	756	11	2.19	460	13	99	100	460	184	7.579	34.7	9.7	50.8	30.4	7.507	43.4	10.4	1.1	11.2	101	4.5
		T3		38.8				0	0.4	9	12	7.7	20	10	5	747	732	739.5	11	2.31	489	13	97	100	445	178	7.575	36	10.6	49.3	30.2	7.5	44.7	10.7	1	11.8	97	4.9
Sham!!!!!		T4		38.8				0	0.4	8	14	7.7	20	10	5	798	747	772.5	10	2.51	507	13	97	100	432.5	173	7.567	36	9.9	56.1	33.3	7.499	39.2	6.7	0.9	11.9	76	4.7
		T5		38.2				0	0.4	8	11	7.7	20	10	5	699	682	690.5	11	2.64	484	12	97	100	432.5	173	7.562	35.7	9.2	58.1	33.6	7.507	43.1	10.1	0.8	11.5	58	4.6
		T6		37.8				0	0.4	8	11	7.7	21	10	5	717	726	721.5	10	2.62	486	13	98	100	400	160	7.564	35.5	9.1	59.4	34.7	7.502	42.2	9	0.8	11.4	118	4.3
		T7		38.2				0	0.4	8	11	7.6	21	10	4	699	731	715	nan	2.53	472	13	98	100	365	146	7.563	35.7	9.3	57.6	34.7	7.499	43.4	9.6	0.6	11.3	108	4.3
		T8		38.1	77	16	4.8125	0	0.4	8	11	7.7	21	10	4	746	716	731	nan	2.447	477	14	98	97	370	148	7.561	36.2	9.4	59.3	35	7.505	42.5	9.5	0.6	11.2	93	4.2
		Ergebnisse
ARDS52-E-09		BLH recipient	30.5	36.7				0	0.4	7	6	6.1	15	8	4	1178	1205	1191.5	5	2.8	488	11	99	100	507.5	203	7.451	42.8	5.3	51.9	34.9	7.389	51.6	5.7	1.7	8.8	101	3.5
		T0		36.9				0	0.4	14	12	7.5	17	9	4	1020	1004	1012	7	3.34	522	13	99	100	502.5	201	7.48	39.5	5.4	62.7	40.1	7.418	46.5	5	1.1	9.2	127	3.4
		T1		38.3				0	0.4	12	9	7.6	16	9	4	913	850	881.5	7	2.69	495	13	98	100	487.5	195	7.539	38.4	9.4	49.1	32.3	7.472	48.2	10.6	0.6	9.4	110	4.1
		T2		39.5				0	0.4	12	10	7.6	17	9	4	886	900	893	7	2.45	480	12	97	100	437.5	175	7.535	36.9	7.8	43.5	30.5	7.456	47.5	8.7	0.9	9.3	108	4
		T3		39.9				0	0.4	12	10	7.3	17	9	4	964	910	937	7	2.37	467	12	98	100	427.5	171	7.523	37	7	40.6	30.3	7.44	48.9	8.2	0.8	9.7	103	4.4
		T4		39.9				0	0.4	11	10	7.2	18	9	4	923	940	931.5	7	2.3	459	12	97	100	420	168	7.514	38.2	7.2	42.4	31.6	7.436	47.1	6.8	0.8	9.8	103	4.5
		T5		39.6				0	0.4	11	9	7.1	18	9	4	994	943	968.5	7	2.24	446	12	98	100	422.5	169	7.515	37.2	6.5	45.3	32.1	7.435	46.6	6.5	0.6	9.7	84	4
		T6		39.1				0	0.4	10	9	7.1	18	9	4	901	917	909	7	2.53	491	12	97	100	407.5	163	7.523	38.8	8.3	51.8	34.9	7.429	38.6	1.1	0.5	9.8	81	4.4
		T7		38.8				0	0.4	10	9	6.6	18	9	4	1008	997	1002.5	7	2.49	462	12	97	100	382.5	153	7.503	40.7	8.1	53.1	36	7.441	49.4	8.6	0.5	9.7	69	4.2
		T8		38.6	58	12	4.83333	0	0.4	9	9	6.6	18	9	4	1011	929	970	6	2.62	466	12	97	100	377.5	151	7.492	40.5	7	55.7	38	7.441	50.6	9.4	0.4	9.4	54	3.9
		Ergebnisse
ARDS52-E-10		BLH recipient	28	36				0	0.4	9	13	7.7	18	9	5	994	977	985.5	10	2.83	359	26	100	99.4	340	136	7.433	47	6.8	80.6	54.2	7.392	52.8	6.6	1.3	9.5	110	3.6
		T0		36.3				1	0.4	15	nan	8.6	23	11	4	780	765	772.5	13	3.14	355	26	97	96.1	245	98	7.342	50.8	1.6	75.9	52.9	7.315	57.6	2.8	3.6	10.5	205	3.6
		T1		37.4				0	0.4	11	16	8.7	21	10	4	730	709	719.5	12	2.23	298	31	98	98.7	277.5	111	7.502	40.9	8.1	79	49.5	7.473	46.6	9.6	1.6	10.2	141	4.1
Sham!!!!!		T2		37.9				0.1	0.4	11	17	8.7	21	10	4	695	618	656.5	13	2.86	352	31	98	97.5	242.75	97.1	7.525	42.2	11.1	78.5	46.9	7.495	45.4	10.8	1	10.3	108	4.7
		T3		38.2				0.1	0.4	11	17	8.6	22	10	4	655	658	656.5	13	3.15	376	30	99	97.9	246.25	98.5	7.544	41.2	12	78.5	46.2	7.512	45.2	12.2	0.9	10.1	109	4.9
		T4		38.4				0.1	0.4	11	17	8.6	22	10	4	686	670	678	13	2.61	621	31	99	97	214.25	85.7	7.55	39.6	11.2	77.7	44.7	7.523	43	11.5	0.7	10.1	98	4.7
		T5		38.8				0.1	0.4	11	nan	8.6	23	11	4	693	723	708	13	2.83	347	31	98	96.2	209.75	83.9	7.537	39.9	10.3	76.1	45.1	7.511	44.4	11.5	0.6	9.9	96	4.7
		T6		38.6				0.1	0.4	10	nan	8.6	23	11	4	680	645	662.5	13	2.78	338	33	99	96.2	201.5	80.6	7.548	40.5	11.8	75.8	44.8	7.517	43.9	11.6	0.6	10	94	5
		T7		38.3				0.1	0.4	11	nan	8.6	23	11	4	672	671	671.5	13	2.62	321	33	99	96.3	207.25	82.9	7.537	40	10.4	76.3	44.8	7.509	43	10.2	0.6	9.6	89	4.7
		T8		38.2	79	15	5.26667	0.1	0.4	10	nan	8.6	23	11	4	622	618	620	13	2.23	298	31	98	96	201.75	80.7	7.548	39.3	10.8	75.2	45.1	7.52	43.6	11.7	0.5	9.7	78	4.5
		Ergebnisse

## Sheet: Donor-Masterfile
ARDS - Donor Masterfile
			Weight [kg]	Temp (PiCCO)	Wet weight lung	Dry weight lung	W/D lung	Arterenol 5/50	FiO2	ZVD	PCWP	MV	Peak	Pmean	PEEP	FRCI	FRCII	Mittel FRC	Peso	CI	GEDI	EVLWI	SpO2	SaO2 BGA	Horowitz	pO2 art	ph art	pCO2 art	BE art	So2 PA	pO2 PA	ph PA	pCO2 PA	BE PA	Lactat art	Hb art	Glucose	Kalium
ARDS52-Sp-01		BLH recipient	29	39.4					0.4	-	10	7.8	19	9	5	720	670	695	-	3.35	408	9	100	100	402.5	161	7.485	45.3	9.8	51.6	35.6	7.43	54	11.2	1.3	8	92	4.5
		T0						13	0.5	-	11	8.3	29	9	5	778	829	803.5	-	3.13	404	12	96	92.2	162.8	81.4	7.325	57.9	3.8	47.1	37.5	7.281	69.4	5.4	3.7	9.8	99	4.9
		T1						10	0.5	-	10	9	28	9	10	912	920	916	-	3.62	413	12	97	96.9	197.2	98.6	7.432	47.1	6.5	57.5	40.3	7.372	58.3	57.5	3.7	9.9	83	5.5
oleic acid		T2		40.2				9	0.5	9	7	9.1	24	13	7	846	839	842.5	-	3.49	403	12	96	98.3	195.2	97.6	7.481	46.2	10.1	41	32.1	7.421	57.1	11.5	2.6	9.6	70	6.3
		T3		40.3				8	0.5	10	9	10	25	13	9	830	813	821.5	-	3.39	370	11	98	98	190.2	95.1	7.501	44.2	10.4	43.5	31.6	7.437	53.7	11	1.9	9.5	65	6.5
		T4		40.1				7	0.4	9	7	9.1	24	13	7	868	926	897	-	3.62	399	12	95.8	-	191.5	76.6	7.49	42.7	8.4	32	45	7.428	53.4	10.1	2.4	8.9	67	6.2
		T5		39.7				7	0.4	9	7	9.6	24	13	8	865	831	848	-	3.87	421	12	100	97.8	224.5	89.8	7.518	40.4	9.1	46.9	32	7.448	48.9	9	2.2	8.7	81	6.1
		T6		39.5				9	0.4	9	8	9	23	13	7	835	938	886.5		3.9	397	12	100	99.4	287.5	115	7.523	40.8	9.8	51.6	34.6	7.466	50.3	11.5	2.3	8.7	92	6.2
		T7		39				9	0.4	8	7	9.1	20	10	4	711	686	698.5		4.46	405	12	100	99.6	277.5	111	7.547	38.6	10.2	58	36	7.496	46.4	11.6	2.3	8.7	104	6.2
		T8		39.1	80.45	16.47	4.88464	9.1	0.4	8	6	9.1	21	10	4	721	761	741		4.52	431	13	99	97.7	224	89.6	7.54	38.7	9.7	54.1	34.1	7.497	45.4	10.9	2.1	8.2	103	5.6
ARDS52-Sp-02		BLH recipient	29	38					0.4	15	9	7.5	18	9	5	880	851	865.5	4	2.57	413	11	100	100	415	166	7.462	42	5.7	48.7	35.8	7.417	50.7	7.5	0.7	9.1	98	3.9
		T0		39.5				6	0.4	3	6	8.3	21	11	5	671	620	645.5	2	2.27	302	16	76	82.2	163.75	65.5	7.275	55	-1.5	24.9	30.9	7.212	70.5	0	5.9	12.5	74	4.6
oleic acid		T1		39.9				6	0.7	6	7	8.6	27	9	10	791	804	797.5	0	1.82	263	16	95	100	312.86	219	7.276	47.4	-4.5	24.5	31.4	7.172	74.3	-1.6	7.3	12.3	44	4.4
		T2		39.9				6	0.5	5	6	9.2	24	13	8	832	832	832	3	1.97	287	14	-	96.8	220	110	7.28	48.7	-3.7	23.4	29.8	7.191	74	-0.4	6.5	12.5	74	4.8
		T3		39.9				10	0.5	5	6	9.2	24	14	8	730	759	744.5	6	2.19	321	15	-	95.3	184.4	92.2	7.294	47.7	-3.2	32.3	33.5	7.221	65.7	-1.1	4.6	11.3	51	4.7
		T4		38.5				10	0.5	7	6	9	24	13	8	749	737	743	7	2.65	313	15	-	93.6	174.2	87.1	7.285	54	-1	42.7	37.7	7.22	54	-1	3.4	10.3	101	4.7
		T5		38.1				20	0.5	7	5	9.2	24	23	8	717	722	719.5	7	2.69	350	14	-	92.3	158.4	79.2	7.324	52.7	1.2	46	37.6	7.266	62.1	1.1	2	10.2	35	5
		T6		38				20	0.5	10	6	8.8	24	13	7	606	628	617	5	5.12	387	17		91.4	153.8	76.9	7.321	49.1	-0.6	57.7	44.1	7.298	63.5	4.2	1.7	9.3	69	6.5
		T7		38.1				20	0.5	10	7	9.3	25	14	7	625	593	609	3	4.49	373	16		90.1	135	67.5	7.361	48.6	1.9	57.2	42.1	7.311	55.2	1.5	1.6	9.6	110	6.7
		T8		37.4	116.1	18.9	6.14286	20	0.5	10	9	9.2	27	15	10	709	682	695.5	3	4.31	375	15	-	92	149.6	74.8	7.355	46	0.1	58.8	42.1	7.322	52.8	1.1	1.5	9.4	89	6.1
ARDS52-Sp-03		BLH recipient	30	36.6				-	0.4	7	-	7.9	18	9	5	753	688	720.5	4	3.07	540	12	96	100	425	170	7.425	-	-10.1	54.7	35.3	7.411	-	-14.2	0.7	9.2	106	3.9
		T0		37.5				160	0.4	6	-	9.4	23	11	5	633	642	637.5	11	3.51	520	16	96	100	172.75	69.1	7.301	44.4	-4.2	87.9	65.9	7.307	49.7	-1.5	4.7	11.9	182	4.4
oleic acid		T1		38.7				120	0.5	3	-	10	17	9	5	602	580	591	4	5.09	479	12	98.2	98.2	260	130	7.274	51.4	-3	66.2	49	7.233	61.5	-1.8	8.2	12.2	152	3.7
		T2		39.3				20	0.4	4	-	9.8	22	10	5	685	598	641.5	8	4.55	505	12	95	98.7	320	128	7.352	44.5	-0.9	57.1	39.9	7.316	38	-6.3	7.8	11.2	106	3.1
		T3		39.4				24	0.4	5	-	9.8	22	10	5	613	661	637	9	5.26	513	13	95	99	310	124	7.429	7.429	2.7	63.7	40	7.388	47.3	2.7	4.4	10.9	113	4.2
		T4		39.3				20	0.4	4	-	9.8	21	10	5	648	626	637	10	5.43	450	13	96	98.1	247.5	99	7.458	42.5	5.7	69.2	40.2	7.439	47.8	7.4	2.2	10.7	115	4.6
		T5		39.2				20	0.4	4	-	9.8	22	10	5	623	638	630.5	10	5.83	550	13	95	97.6	227	90.8	7.464	42.5	6.1	69	42.1	7.419	48.7	6.3	1.8	10.5	119	4.5
		T6		39.1				20	0.4	4	-	9.8	22	11	5	608	637	622.5	9	6.61	507	17	93	97.1	214.25	85.7	7.465	38.9	3.8	72.9	40.4	7.417	48	5.8	1.5	10.3	128	4.7
		T7		39				20	0.4	4	-	9.8	22	11	5	585	578	581.5	9	5.84	482	16	95	99	282.5	113	7.463	43.7	6.8	57.2	35.9	7.425	48.8	7	1.5	9.8	139	5.1
		T8		38.9	86	18	4.77778	20	0.4	4	-	9.8	21	10	5	630	666	648	9	6.31	475	16	94	97.5	231.75	92.7	7.462	43.2	6.4	61.3	37.1	7.433	49	7.8	1.3	9.9	144	5
ARDS52-Sp04		BLH recipient	26kg	35.8				0	0.4	4	5	6.3	16	9	4	803	793	798	6	2.9	409	12	100	100	392.5	157	7.455	43.6	6.1	62.6	39.8	7.398	48.4	4.6	0.9	8.6	97	4
		T0		38.6				28	0.4	4	5	7.3	20	10	4	591	553	572	6	5.53	439	13	96	92.3	204.25	81.7	7.295	59.4	2.1	46.4	64	7.28	62.4	2.2	1.8	10.4	184	4.2
oleic acid		T1		39.1				8	0.4	4	5	7.4	20	10	4	565	600	582.5	5	5.06	433	14	97	95.2	238	95.2	7.378	49.4	3.5	67	45.1	7.356	56.5	5.5	1.7	10.6	131	4.1
		T2		38.7				8	0.4	6	5	7.4	21	10	4	591	609	600	5	5.28	418	14	97	95.7	212.75	85.1	7.414	50.1	6.8	69.7	46	7.395	55.6	8.3	1	10.4	105	4.5
		T3		38.3				8	0.4	6	5	7.3	21	10	4	623	604	613.5	6	5.64	429	16	96	96.2	226.5	90.6	7.426	48.3	6.7	72.3	47.2	7.404	52.9	7.5	0.7	10.3	111	4.7
		T4		38				6	0.4	5	5	7.3	21	10	4	713	620	666.5	6	5.36	467	16	95	94.9	206	82.4	7.425	49.3	7.2	73.5	45.9	7.407	52	7.3	0.6	10.3	115	4.7
		T5		37.5				6	0.4	6	7	7.3	21	10	4	637	674	655.5	5	4.86	434	16	96	94.4	189.75	75.9	7.45	44.6	6.4	70.5	44.8	7.428	47.1	6.2	0.5	9.1	104	4.3
		T6		38.6				5	0.4	6	7	7.3	22	10	4	593	607	600	8	5.55	441	16	95	93.3	186.5	74.6	7.452	47.3	8.3	68	43	7.419	50.6	7.6	0.5	9.3	91	4.5
		T7		38.6				5	0.4	7	6	7.3	22	10	4	665	650	657.5	8	5.87	440	15	95	95	201.75	80.7	7.45	46.7	7.8	69.9	43.9	7.43	49.6	7.9	0.5	9.2	106	4.3
		T8		38.6	106	19	5.57895	5	0.4	6	6	7.2	22	10	4	808	713	760.5	6	5.59	425	11	93	93.7	179.25	71.7	7.455	47.2	8.5	67.5	41.4	7433	48.1	7.2	0.5	8.9	100	4.1
ARDS52-Sp05		BLH recipient	20.5	38.2					0.4	4		6.4	18	9	5	278	353	315.5	6	2.83	290	8	100	100	412.5	165	7.49	38.7	5.6	46.1	33.3	7.433	49.3	8	1.6	9	114	4.1
		T0		38.2					0.4	4		6.4	18	9	5	278	353	315.5	6	2.83	290	8	100	100	412.5	165	7.49	38.7	5.6	46.1	33.3	7.433	49.3	8	1.6	9	114	4.1
Sham		T1		39.7				0	0.4	6	6	6.4	19	9	4	343	347	345	5	2.61	274	8	100	100	435	174	7.492	38.8	5.9	44.5	32.9	7.384	49	3.9	1.9	9.3	119	4.9
		T2		39.6				0	0.4	7	6	6.3	20	10	4	340	303	321.5	6	2.38	271	8	100	100	417.5	167	7.51	39.2	7.5	41.4	31.3	7.411	52.9	8.2	2.4	9.9	118	5
		T3		39.4				0	0.4	7	6	6.4	20	10	4	336	368	352	7	2.91	292	9	100	100	417.5	167	7.549	36.9	9	48.6	33.2	7.46	48.2	9.6	1.9	9.4	101	5.5
		T4		39.3				0	0.4	6	6	6.4	21	10	4	313	292	302.5	7	3.24	287	9	100	100	485	194	7.564	35.5	9.1	54.4	33.8	7.495	44.5	10.1	0.9	8.8	94	5.3
		T5		39.1				1	0.4	5	5	6.4	22	10	5	302	303	302.5	8	2.89	271	10	99	99.7	300	120	7.563	35.5	9	48.4	31.9	7.504	46	12	0.8	8.5	81	5.3
		T6		38.8				1	0.4	5	6	6.2	21	10	5	288	280	284	7	3.31	293	9	100	99.5	290	116	7.576	35.5	10.1	55.9	32.7	7.51	40.9	8.8	0.8	8.4	94	4.9
		T7		38.8				1	0.4	6	5	6.2	21	10	4	276	297	286.5	6	3.46	282	10	100	100	248.25	99.3	7.567	35.3	9.2	55.1	33.9	7.52	41.6	10.2	0.8	8.5	89	4.6
		T8		38.4	57	13	4.38462	1	0.4	5	6	6.2	21	10	4	303	298	300.5	5	3.36	294	10	100	100	295	118	7.568	33.6	7.7	52.9	32.3	7.516	41.3	9.6	0.8	8	86	4.1
ARDS52-SP-06		BLH recipient	30	37.3				0	0.4	7	13	5.5	18	9	5	480	477	478.5	8	3.26	401	11	98	100	495	198	7.522	37.8	7.5	63.3	37.5	7.472	43.2	7.2	1.4	10.1	98	4.2
		T0		38.3				15	0.4	5	33	5.6	25	11	4	484	475	479.5	8	3.76	419	12	93	91.3	176	70.4	7.402	47.9	4.5	51.1	37.5	7.379	55.3	6.6	2	11.7	96	4.4
		T1		39.6				5	0.5	5	10	6.4	26	13	7	617	611	614	8	3.34	342	13	97	99.8	292	146	7.466	40.4	5	60.2	39	7.417	50.4	7.2	2	11.3	79	4.5
oleic acid		T2		39.9				5	0.5	5	6	6.5	25	13	7	663	619	641	9	3.57	326	12	96	100	418	209	7.495	39.2	6.4	62.5	39	7.449	45.8	7	1.9	11.8	109	4.9
		T3		39.2				5	0.4	5	4	6.4	21	10	4	557	563	560	8	4.39	338	16	100	100	390	156	7.526	37.8	7.8	68.1	41	7.48	42.4	7.3	1.4	11	110	4.8
		T4		38.9				3	0.4	6	6	6.4	21	10	4	560	516	538	10	4.24	347	14	99	100	392.5	157	7.538	35	6.6	65.4	39.1	7.507	42.8	9.9	1.1	10	109	4
		T5		38.6				3	0.4	6	5	6.4	21	10	5	512	507	509.5	9	4.45	347	12	99	100	400	160	7.546	36.4	8.4	66.1	38.7	7.509	42.3	9.8	1	9.9	108	4.3
		T6		39.1				3	0.4	5	3	6.4	22	10	5	559	504	531.5	8	4.51	382	13	100	100	352.5	141	7.548	35.9	8.1	67.2	39.4	7.487	39.8	6.2	1	9.6	104	4.4
		T7		39.1				3	0.4	5	5	6	23	10	4	539	536	537.5	9	4.28	340	14	100	99.7	325	130	7.515	37.3	6.5	67.3	40.5	7.487	43.4	8.6	0.9	9.5	99	4.3
		T8		39.1	85	18	4.72222	3	0.4	5	6	6	22	10	4	545		545	9	4.23	354	13	100	99.9	332.5	133	7.509	37.4	6.2	65.5	38.9	7.478	44.3	8.5	0.9	9.4	97	4.2
ARDS52-Sp 07		BLH recipient	29	36.6				0.1	0.4	6	9	5.5	19	9	4	788	649	718.5	8	3.77	619	18	100	100	450	180	7.508	38.4	6.8	53.7	35.4	7.477	47.2	10.3	0.7	8.7	60	3.8
		T0		38.2				4	0.4	8	9	6.4	28	14	8	575	558	566.5	9	3.38	626	20	100	89.8	168.75	67.5	7.44	44.3	5.4	29.2	27.5	7.372	57	7.2	1.9	9.7	67	4.4
		T1		39.2				2	0.5	8	10	6.4	26	14	7	570	598	584	7	3.14	584	18	100	99.8	324	162	7.464	43.9	7	37.5	30.9	7.392	57.3	9	2.1	10.2	96	5
oleic acid		T2		39				2	0.4	8	11	6.4	26	14	7	614	577	595.5	10	3.34	639	16	100	99.4	330	132	7.485	42.5	7.9	38.5	30	7.412	53.8	8.8	1.3	10	102	5.4
		T3		38.9				0.1	0.4	6	5	6.4	21	10	4	517	517	517	11	3.69	568	18	100	99.3	317.5	127	7.486	43.2	8.5	50.9	38..1	7.437	49.9	8.6	0.9	9.3	82	5
		T4		38.9				0.1	0.4	5	5	6.4	21	10	4	513	481	497	10	4.32	582	17	100	98.7	277.5	111	7.501	43.2	9.7	54.7	36.5	7.443	51.2	10	0.6	8.9	78	5.4
		T5		38.7				0.1	0.4	6	5	6.4	23	11	4	476	516	496	10	4.04	515	16	100	98.2	247.25	98.9	7.498	43	9.3	54.7	35.6	7.44	51.8	10.1	0.5	8.8	78	5.6
		T6		38.3				0.1	0.4	6	7	6.4	23	11	4	491	453	472	10	3.6	521	16	100	98.4	252.5	101	7.49	41.1	7.2	52.1	35.6	7.424	53.2	9.6	0.7	8.2	89	4.9
		T7		39				0.1	0.4	6	6	6.4	22	10	5	503	453	478	10	4.09	561	16	100	97.2	223.5	89.4	7.492	43.8	9.3	51.6	35.1	7.434	52.5	10.1	0.6	8.4	90	5.3
		T8		39.5	70	14	5	0.1	0.4	6	7	6.4	20	10	4	541	528	534.5	9	4.22	616	16	100	98.3	249.75	99.9	7.502	42.7	9.4	55	35.8	7.446	49.2	9	0.5	8.4	95	5.4
ARDS52-Sp 08		BLH recipient	27	35.3				0	0.4	5	7	5.9	15	8	5	1190	1218	1204	6	2.81	399	10	97	100	462.5	185	7.442	42.3	4.3	70.6	42.9	7.4	45.8	3.2	0.6	9.7	88	3.7
		T0		35.3				0	0.4	5	7	5.9	15	8	5	1190	1218	1204	6	2.81	399	10	97	100	462.5	185	7.442	42.3	4.3	70.6	2.9	7.4	45.8	3.2	0.6	9.7	88	3.7
		T1		36.4				0	0.4	5	9	6.1	16	9	5	1171	1121	1146	7	2.94	422	10	98	100	485	194	7.453	43.9	6.1	71.5	42.6	7.409	48.8	5.6	0.5	9.7	88	4
		T2		37.4				0	0.4	5	10	6.5	17	9	4	1028	1020	1024	6	2.41	387	11	97	100	640	256	7.464	41.7	5.6	63.2	38.5	7.428	49.5	7.7	0.6	9.4	87	4.4
Sham		T3		38.4				0	0.4	4	8	7.2	17	9	5	1060	1125	1092.5	8	3.37	410	10	96	100	452.5	181	7.481	41.3	6.7	68.9	40.6	7.439	45.8	6.3	0.5	9.4	94	4.6
		T4		38.7				0	0.4	4	7	7.2	17	9	5	1083	1029	1056	9	2.84	385	10	99	100	432.5	173	7.493	39	6	65.7	38.4	7.453	44.6	6.7	0.5	9	90	4.4
		T5		39				0	0.4	6	6	7.2	17	9	5	1055	1044	1049.5	9	2.78	389	11	99	100	432.5	173	7.494	38.6	5.8	61.7	36.3	7.443	44.2	5.6	0.4	8.8	83	4.5
		T6		38.9				0	0.4	4	6	7.2	17	9	5	1064	1080	1072	9	3.03	392	11	98	100	425	170	7.487	39.6	6	64	38.6	7.443	46.7	7.2	0.4	9.3	85	4.4
		T7		38.7				0	0.4	4	7	7.2	18	9	5	1047	1028	1037.5	12	3.01	398	11	98	100	402.5	161	7.484	40.8	6.6	65	38.2	7.431	43.3	4.2	0.4	9.5	85	4.4
		T8		38.3	71	15	4.73333	0	0.4	4	7	7.2	18	9	4	1116	1148	1132	7	2.65	384	11	98	100	387.5	155	7.483	39.4	5.6	63.3	37.3	7.44	44.1	5.3	0.4	9.1	75	4.1
ARDS52-SP 09		BLH recipient	31	36.3					0.4	7	10	8.8	17	9	5	813	796	804.5	7	3.48	485	10	99	100	472.5	189	7.463	41.7	5.5	61.7	39.5	7.427	49.1	7.3	0.5	9.1	61	3.9
		T0		38.4				10	0.4	8	9	11.3	22	10	4	668	636	652	7	4.96	501	12	94	95.5	215	86	7.413	42.3	3.1	64.6	43.9	7.396	51.9	6.3	1.3	10.6	76	4.1
		T1		39.4				8	0.4	8	7	11.4	22	10	4	659	689	674	6	5.19	475	12	97	99.2	302.5	121	7.467	41.9	6	67.5	42.9	7.439	48.2	7.8	1.4	10.4	78	5.1
		T2		38.9				6	0.4	8	8	11.3	22	10	4	689	710	699.5	7	5.1	439	14	98	100	382.5	153	7.486	40.3	6.4	71.5	43.8	7.459	45.3	7.6	1.1	10.5	94	5.3
		T3		39.8				1	0.4	7	10	11.4	22	10	5	626	710	668	8	4.29	479	12	98	100	332.5	133	7.496	37.8	5.5	64.7	38.2	7.466	42.6	6.4	0.8	9.4	96	5.1
		T4		39.5				0	0.4	8	9	11.2	21	10	5	647	659	653	8	3.81	486	12	98	99.7	300	120	7.518	36.3	6	55.7	34.5	7.471	44	7.7	0.6	8.8	97	4.9
		T5		39.1				0	0.4	7	10	11.4	22	10	5	644	638	641	8	3.7	500	12	97	98.8	250	100	7.509	37.1	5.9	53.1	34.4	7.464	44	7.1	0.6	9.1	97	4.7
		T6		38.7				0	0.4	7	9	11.3	22	10	4	702	659	680.5	8	3.62	497	14	95	98.5	224	89.6	7.5	37.4	5.4	52.9	33.4	7.469	43.9	7.5	0.6	8.4	90	4.6
		T7		38.7				0	0.4	8	10	11.3	22	10	4	611	666	638.5	8	3.6	536	13	94	97.5	217.25	86.9	7.499	38.5	6.2	50.8	32.8	7.455	44	6.4	0.6	8.6	90	4.6
		T8		38.6	86	16	5.375	1	0.4	9	10	11.4	23	10	4	634	596	615	7	3.95	532	14	95	99	257.5	103	7.498	37.6	5.4	60.4	37.2	7.466	43.3	6.8	0.6	8.6	82	4.6
		Ergebnisse
ARDS52-SP10		BLH recipient	30	36				0	0.4	9	NAN	7.9	19	9	4	638	616	627	7	3.08	498	11	97	100	455	182	7.511	41.4	9.2	56.3	37.4	7.449	51.6	10.8	0.8	8.8	115	4
		T0		36				0	0.4	9	NAN	7.9	19	9	4	638	616	627	7	3.08	498	11	97	100	455	182	7.511	41.4	9.2	56.3	37.4	7.449	51.6	10.8	0.8	8.8	115	4
		T1		37.4				2	0.4	8	NAN	8.1	20	10	4	565	602	583.5	9	2.81	471	10	100	100	420	168	7.509	39.9	8	49.1	33.3	7.44	50.9	9.5	1	9.1	118	4.2
		T2		38.9				1	0.4	9	NAN	8	20	10	4	626	588	607	8	3.07	504	11	100	100	455	182	7.543	37.9	9.2	44.3	31.1	7.463	48.8	10.2	0.9	8.6	120	4.6
		T3		39.5				2	0.4	9	11	8	20	10	4	566	534	550	8.5	3.04	479	12	98	99.9	435	174	7.556	37.4	10	46.1	31.8	7.48	45.6	9.6	0.9	8.7	129	5.4
Sham		T4		39.6				2	0.4	9	NAN	8.1	21	10	4	555	546	550.5	8.5	2.93	487	12	97	100	427.5	171	7.566	37.3	10.7	41.1	28.7	7.478	47.4	10.6	0.7	8.7	129	5.6
		T5		39.7				2	0.4	8	NAN	8	21	10	4	608	547	577.5	8	2.81	461	12	97	100	415	166	7.569	36.7	10.4	40.4	28.1	7.492	44.7	10	0.5	8.5	119	5.2
		T6		39.9				2	0.4	9	11	8.1	22	10	5	540	543	541.5	8	2.59	431	12	97	100	397.5	159	7.568	37.3	10.9	39.3	27.3	7.484	45	9.5	0.5	8.4	119	5.1
		T7		39.9				2	0.4	9	10	8	22	10	4	578	575	576.5	9	2.96	477	13	99	100	390	156	7.56	37.1	10.1	41.2	28.5	7.483	45.3	9.6	0.5	8.4	110	4.9
		T8		39.8	71	15	4.73333	2	0.4	8	10	8	22	10	4	576	580	578	10	6.06	456	14	98	100	377.5	151	7.553	36.8	9.2	43.7	29.9	7.47	42.9	6.9	0.6	8.3	105	4.6
